# Supplementary material
Source: PubMed Central journal article supplement (PMC3370792)
Supplement: supp_56.6.3207_TableS1-S2.pdf [file supp_56.6.3207_TableS1-S2.pdf]

1 Supplementary Information

2 **Supplementary Table S1**

3 IC<sub>50</sub> values of mefloquine and the two lead compounds WR7930, *threo*- enpiroline and it's  
4 enantiomers (+/- *threo*) evaluated with L6-rat skeletal myoblast cells after 72 h exposure.

| Compound     | Mefloquine            | WR7930 | Enpiroline | (+)- <i>threo</i> | (-)- <i>threo</i> |
|--------------|-----------------------|--------|------------|-------------------|-------------------|
|              | IC <sub>50</sub> [uM] |        |            |                   |                   |
| AVERAGE [μM] | 11.8                  | 16.5   | 9.7        | 13.2              | 11.8              |
| SD           | 7.2                   | 9.8    | 4.7        | 6.1               | 8.0               |

5  
6 The determination of the cytotoxicity was performed with L-6 rat skeletal myoblast cells  
7 according to a previously reported procedure (1). Briefly, L-6 cells were seeded in 96-well  
8 microtiter plates at a density of 4\*10<sup>4</sup> cells/mL in RPMI 1640 medium supplemented with 10  
9 % fetal bovine serum and L-glutamine (2 mM). A three-fold serial dilution ranging from 30 to  
10 0.04 μg/mL in test medium was added. Podophyllotoxin (concentration range: 0.1 - 4\*10<sup>-4</sup>  
11 μg/mL ) served as positive control, with IC<sub>50</sub> values of podophyllotoxin showing an average  
12 of 0.006 μg/mL in all experiments . The plates were incubated at 37°C ,5 % CO<sub>2</sub> atmosphere.  
13 After 70 hours, Alamar Blue (10 μL) was added to each well and incubation was continued  
14 for a further 2 - 3 hours. The plate was then read with a SpectraMax M2 (MolecularDevices)  
15 instrument by the use of an excitation wavelength of 530 nm and an emission wavelength of  
16 590 nm. Fluorescence development was expressed as percentage of the control and the IC<sub>50</sub>  
17 values were determined. Experiments were repeated at least three times and IC<sub>50</sub> values  
18 calculated as averages.

19  
20  
21  
22

23 **Supplementary Table S2**

24 Percentage of HepG2-viability evaluated with MTT 24h post exposure with mefloquine,  
 25 WR7930, enpiroline and its enantiomers.

| Compound         | Concentration<br>[ $\mu$ M] | Viability [%]<br>(SD) |
|------------------|-----------------------------|-----------------------|
| Mefloquine       | 72.3                        | 1.9 (1.6)             |
|                  | 7.2                         | 90.3 (5.0)            |
|                  | 0.7                         | 99.3 (0.9)            |
| WR7930           | 69.4                        | 0.8 (0.1)             |
|                  | 6.9                         | 91.1 (0.4)            |
|                  | 0.7                         | 96.9 (10.8)           |
| Enpiroline       | 59.7                        | 0.9 (0.1)             |
|                  | 6.0                         | 98.1 (4.2)            |
|                  | 0.6                         | 107.2.4 (9.0)         |
| <i>(+)-threo</i> | 59.7                        | 0.8 (0.1)             |
|                  | 6.0                         | 84.3 (9.2)            |
|                  | 0.6                         | 94.4 (21.2)           |
| <i>(-)-threo</i> | 59.7                        | 0.9 (0.2)             |
|                  | 6.0                         | 89.5 (19.5)           |
|                  | 0.6                         | 80.9 (9.5)            |

26

27 The viability of HepG2 cells was evaluated 24 h post exposure using colorimetric MTT (3-  
 28 (4,5-dimethylthiazol-2-yl)-2,5-diphenyltetrazolium bromide) readout. For that purpose  
 29 HepG2 cells were seeded at a density of  $5 \times 10^4$  cells/well in DMEM low glucose medium  
 30 supplemented with 10% FCS, 1% Penicillin-Streptomycin and 1% non-essential amino acids  
 31 in 96 well-plates. Plates were incubated 24 h at 37°C, 5% CO<sub>2</sub> to allow attaching of cells.  
 32 Then the medium was removed and 100  $\mu$ l supplemented DMEM I low glucode medium,  
 33 spiked with test compounds, was added to each well reaching final test drug concentrations of  
 34 30, 3 or 0.3  $\mu$ g/mL. Each concentration was performed at least in quadruplicate. Control wells

35 with blank medium were included for each drug and terfenadin (10 and 15  $\mu\text{M}$ ) served as  
36 positive control. Plates were incubated for 24 h. Next, medium was replaced with 100  $\mu\text{l}$  of  
37 blank culture medium containing 10% MTT solution (5 mg MTT/ml PBS) and incubation  
38 was continued for 2 h. Finally, the medium was discarded and the water-insoluble crystals  
39 were dissolved by adding 20 $\mu\text{l}$  of 3% SDS and 100  $\mu\text{l}$  of 10M isopropanol-HCl. When  
40 crystals were completely dissolved, optical density (OD) was measured at 550 nm using,  
41 Spectramax M2 (Molecular devices). OD development was expressed as percentage of the  
42 control.

43

#### 44 **Results**

45 The lead compounds (WR7930, enpiroline and both enantiomers) showed similar patterns of  
46 cytotoxicity when compared to the parent drug mefloquine. Hepatic HepG2- cells were  
47 strongly affected after treatment with the highest concentration of 30  $\mu\text{g/ml}$ , whereas the other  
48 tested concentrations (3, 0.3  $\mu\text{g/ml}$ ) did not reduce the cell viability. After a 72h- treatment of  
49 L6- rat skeleton cells  $\text{IC}_{50}$  values ranging from 9.7 – 16.5  $\mu\text{M}$  were observed.

50

#### 51 **References**

- 52 1. Sperandeo NR, Brun R. Synthesis and biological evaluation of  
53 pyrazolynaphthoquinones as new potential antiprotozoal and cytotoxic agents.  
54 *Chembiochem* 2003; **4**: 69-72

55
